# Supplementary material for: Monoterpene Synthase Genes and Monoterpene Profiles in Pinus nigra subsp. laricio
Source: MDPI journal article supplement (doi:10.3390/plants11030449), 2022-02-06
Supplement: s1 [file s1]

## Additional tables

**Table S1.** Full-length cDNA sequences of putative MBOSs and MTPSs in *Pinus* spp. retrieved from the NCBI database

| Species                                          | Function                                      | Abbreviation | Accession mRNA sequence | ORF (bp) | Accession protein sequence | Amino acids (aa) |
|--------------------------------------------------|-----------------------------------------------|--------------|-------------------------|----------|----------------------------|------------------|
| <i>Pinus arizonica</i> var. <i>cooperi</i>       | 2-methyl-3-buten-2-ol synthase                | Par MBOS1    | JN039226                | 1845     | AFJ73545                   | 614              |
| <i>Pinus banksiana</i>                           | (-)- $\alpha$ -pinene synthase                | Pb MTPS1     | JQ240304                | 1890     | AFU73856                   | 629              |
|                                                  | (-)- $\beta$ -pinene synthase                 | Pb MTPS2     | JQ240291                | 1887     | AFU73843                   | 628              |
|                                                  | (-)- $\beta$ -pinene synthase (TPS-(-)Bpin2)  | Pb MTPS3     | JQ240292                | 1884     | AFU73844                   | 627              |
|                                                  | (-)- $\alpha$ / $\beta$ -pinene synthase      | Pb MTPS4     | JQ240290                | 1872     | AFU73842                   | 623              |
|                                                  | $\alpha$ terpineol synthase                   | Pb MTPS5     | JQ240308                | 1881     | AFU73860                   | 626              |
|                                                  | (+)-3-carene synthase                         | Pb MTPS6     | JQ240306                | 1881     | AFU73858                   | 626              |
|                                                  | (+)-3-carene synthase                         | Pb MTPS7     | JQ240305                | 1881     | AFU73857                   | 626              |
|                                                  | (+)- $\alpha$ -pinene synthase                | Pb MTPS8     | JQ240298                | 1887     | AFU73850                   | 628              |
|                                                  | Monoterpene synthase                          | Pb MTPS9     | JQ240296                | 1887     | AFU73848                   | 628              |
|                                                  | Monoterpene synthase                          | Pb MTPS10    | JQ240297                | 1887     | AFU73849                   | 628              |
|                                                  | (-)- $\beta$ -phellandrene synthase           | Pb MTPS11    | JQ240302                | 1866     | AFU73854                   | 621              |
| <i>Pinus contorta</i>                            | (-)- $\alpha$ -pinene synthase                | Pc MTPS1     | JQ240303                | 1890     | AFU73855                   | 629              |
|                                                  | (-)- $\beta$ -pinene synthase                 | Pc MTPS2     | JQ240293                | 1884     | AFU73845                   | 627              |
|                                                  | Monoterpene synthase                          | Pc MTPS3     | JQ240294                | 1884     | AFU73846                   | 627              |
|                                                  | (+)-3-carene synthase                         | Pc MTPS4     | JQ240307                | 1881     | AFU73859                   | 626              |
|                                                  | (+)- $\alpha$ -pinene synthase                | Pc MTPS5     | JQ240295                | 1887     | AFU73847                   | 628              |
|                                                  | $\alpha$ terpineol / 1,8-cineole synthase     | Pc MTPS6     | JQ240309                | 1851     | AFU73861                   | 616              |
|                                                  | (-)-camphene / (+)- $\alpha$ -pinene synthase | Pc MTPS7     | JQ240299                | 1860     | AFU73851                   | 619              |
|                                                  | (-)- $\beta$ -phellandrene synthase           | Pc MTPS8     | JQ240301                | 1866     | AFU73853                   | 621              |
|                                                  | (-)- $\beta$ -phellandrene synthase           | Pc MTPS9     | JQ240300                | 1875     | AFU73852                   | 624              |
| <i>Pinus kesiya</i> var. <i>langbianensis</i>    | Monoterpene synthase                          | Pk MTPS1     | KX394684                | 1956     | AQZ36562                   | 651              |
|                                                  | $\alpha$ -pinene synthase                     | Pk MTPS2     | KM382173                | 1875     | AIY22674                   | 624              |
| <i>Pinus massoniana</i>                          | (-)- $\alpha$ -pinene synthase                | Pm MTPS1     | KF547035                | 1890     | AGW25369                   | 629              |
|                                                  | $\alpha$ -terpineol synthase                  | Pm MTPS2     | KJ803197                | 1863     | AIL88641                   | 620              |
| <i>Pinus pinaster</i>                            | $\alpha$ -pinene synthase                     | Pp MTPS1     | KP780394                | 1890     | ALB78130                   | 629              |
|                                                  | $\alpha$ -pinene synthase                     | Pp MTPS2     | KP780395                | 1890     | ALB78131                   | 629              |
| <i>Pinus pinea</i>                               | $\alpha$ -pinene synthase                     | Ppinea MTPS1 | KR011842                | 1890     | ALD18902                   | 629              |
|                                                  | $\alpha$ -pinene synthase                     | Ppinea MTPS2 | KR011841                | 1890     | ALD18901                   | 629              |
| <i>Pinus pseudostrobus</i>                       | 2-methyl-3-buten-2-ol synthase                | Pps MBOS1    | JN039254                | 1845     | AFJ73572                   | 614              |
| <i>Pinus pseudostrobus</i> var. <i>estevezii</i> | 2-methyl-3-buten-2-ol synthase                | Pest MBOS1   | JN039251                | 1845     | AFJ73569                   | 614              |
| <i>Pinus sabiniana</i>                           | 2-methyl-3-buten-2-ol synthase                | Psab MBOS1   | JF719039                | 1845     | AEB53064                   | 614              |
| <i>Pinus tabuliformis</i>                        | $\alpha$ -pinene synthase                     | Ptab MTPS1   | EF608499                | 1890     | ABY65904                   | 629              |
| <i>Pinus taeda</i>                               | (-)- $\alpha$ -pinene synthase                | Pt MTPS1     | AF543527                | 1890     | AAO61225                   | 629              |
|                                                  | $\alpha$ -terpineol synthase                  | Pt MTPS2     | AF543529                | 1884     | AAO61227                   | 627              |
|                                                  | (+)- $\alpha$ -pinene synthase                | Pt MTPS3     | AF543530                | 1887     | AAO61228                   | 628              |
| <i>Pinus teocote</i>                             | 2-methyl-3-buten-2-ol synthase                | Pteo MBOS1   | JN039258                | 1845     | AFJ73576                   | 614              |
| <i>Physcomitrella patens</i>                     | <i>ent</i> -kaurene synthase                  | Pt TPS-entKS | AB302933                | 2646     | BAF61135                   | 881              |

**Table S2.** Forward and Reverse primers used for the isolation of cDNAs and genomic sequences coding for MBOS (Group 1) and MTPSs (Groups 2-7) in *Pinus nigra* subsp. *laricio*. RACE, Rapid Amplification of cDNA Ends

|                          | Phylogentic group | Forward primers 5'→3'                                                                               | Reverse primers 5'→3'                  |
|--------------------------|-------------------|-----------------------------------------------------------------------------------------------------|----------------------------------------|
| <b>cDNA sequences</b>    | Group 1           | F1c: TCATCATTCCAACCTCTGGGA (165)                                                                    | R1c: AGGCACAGGCTCAATGAC (1839)         |
|                          | Group 2           | F1c: CACCATGTGTTTGACAGCCC (147)                                                                     | R1c: TTTATTTTCATTGGTGCGACG (1838)      |
|                          | Group 3           | F1c: TTCTAACCTGTGGGACGACAA (207)                                                                    | R1c: TACATTAGCACGGGTTTCG (1880)        |
|                          | Group 4           | F1c: TTCTGTCAACGCCTTATGGG (242)                                                                     | R1c: TATAAAGGCACAGGTTCAAGGAG (1883)    |
|                          | Group 5           | F1c: GGACCGCGTATCTGATGATG (167)                                                                     | R1c: GTGACAGGATCAATGACGGT (1883)       |
|                          | Group 6           | F1c: CGCAACGTCCTTATGAGGCAC (240)                                                                    | R1c: CACAGGTTCAAGGACGGT (1851)         |
|                          | Group 7           | F1c: GGGAGGGAATCCATAGCAC (120)                                                                      | R1c: GCACAGTTTCAACGACGG (1879)         |
| <b>Race 5'-3' ends</b>   |                   | <b>Race 5'</b>                                                                                      | <b>Race 3'</b>                         |
|                          | Group 1           | R1: AACACATCTGAAGACACCGGG (545)<br>R2: CCATAAGGCGTTGAGAGGGAC (221)<br>R3: GGTTATCCGACACATGCGG (126) | F1Race3': AATAGACTTTCCTTCGAGGC (1306)  |
|                          | Group 2           | R1: AAGGCCAGTGCAGTTGAGT (534)<br>R2: GGCGCTCATAATGTGTGG (236)<br>R3: GCATCTGACACAGCGGTTGTT (149)    | F1Race3': CAGATAGTGCCCGTGGAGAA (1212)  |
|                          | Group 3           | R1: CGCCAGAGCAGTTGTGTGAG (534)<br>R2: CAGCATGCTCACCGTACGA (283)<br>R3: GTGGCCGAACATCATCTGAT (161)   | F1Race3': GCATTGACATGGTGCTGAAC (1055)  |
|                          | Group 4           | R1: GAAGAGTTCGAAAGCCCAAGG (553)<br>R2: GCACGTTACCGGTAAGCGA (296)<br>R3: ACTGATTTCCGTGGCTCG (140)    | F1Race3': GCAATTAAGAGATGGGATCCG (1189) |
|                          | Group 5           | R1: GGTTCAAGACCCAAGGCAG (552)<br>R2: TCTCAGCACGTTCCCGATAAG (295)<br>R3: GCTCATGGAAGCACGTGTCA (156)  | F1Race3': AAGAGATGGGATCCGTCG (1198)    |
|                          | Group 6           | R1: CAGCACTTTGTCTCCACGTC (508)<br>R2: TCGGCACGTTTGAGGTAGG (287)<br>R3: ACTCACGCGAATGGAAGGTC (153)   | F1Race3': CCGTCGGTTGTAGATTGTC (1186)   |
|                          | Group 7           | R1: TCTTGCCACGTCCAATG (503)<br>R2: AGGCTATGGAATCATCGTCC (244)<br>R3: AGGTGCTATGGATTTCCTC (141)      | F1Race3': CTTGGAACAATGGAGGAGC (1152)   |
| <b>Genomic sequences</b> |                   | <b>Forward primers 5'→3'</b>                                                                        | <b>Reverse primers 5'→3'</b>           |
|                          | Group 1           | F1g: ATGTCCTGCTCTCTGTGCG (1)                                                                        | R1g: AGGCACAGGCTCAATGAC (1839)         |
|                          | Group 2           | F1g: ATGGCTCTACTTTCTGTGCG (1)                                                                       | R1g: TTTATTTTCATTGGTGCGACG (1838)      |
|                          | Group 3           | F1g: ATGTCTCTTATTTCCGCTGTG (1)                                                                      | R1g: TACATTAGCACGGGTTTCG (1880)        |
|                          | Group 4           | F1g: ATGGATTTAATATCTGTC (1)                                                                         | R1g: TATAAAGGCACAGGTTCAAGGAG (1883)    |
|                          | Group 5           | F1g: ATGTCTCTGTTTCTGTGATC (1)                                                                       | R1g: GTGACAGGATCAATGACGGT (1883)       |
|                          | Group 6           | F1g: ATGGCTCTGGCTCTGGTT (1)                                                                         | R1g: CACAGGTTCAAGGACGGT (1851)         |
|                          | Group 7           | F1g: ATGGCTCTGGTTTCTGCTG (1)                                                                        | R1g: GCACAGTTTCAACGACGG (1879)         |

**Table S3.** Statistical evaluation of the differences (one-way ANOVA followed by Tukey test) among the relative expression levels of *MBOS* and *MTPS* genes in five different tissues of *P. laricio*. The expression data of each gene were normalized using the geometric average of the two reference genes *CYP* and *upLOC*. Relative expression levels of the different *MBOS* and *MTPS* genes were referred to a calibrator, set to the value 1, which was represented by the gene in the five tissues with the lowest expression (*MTPS3* in YN). Different letters denote significant differences according to the Tukey's test ( $p < 0.01$ ). YN: young needles; MN: mature needles; LS: bark and xylem combined from the leader stem; IS: bark and xylem combined from the interwhorl stems; R: roots.

|           |                       |         |
|-----------|-----------------------|---------|
| MBOS 1_LS | 218,873 <sup>a</sup>  | ± 28.42 |
| MTPS 6_LS | 185,546 <sup>a</sup>  | ± 21.82 |
| MTPS 5_LS | 180,853 <sup>a</sup>  | ± 22.09 |
| MBOS 1_MN | 137,811 <sup>b</sup>  | ± 14.98 |
| MBOS 1_R  | 129,661 <sup>b</sup>  | ± 13.33 |
| MTPS 1_YN | 120,568 <sup>bc</sup> | ± 14.55 |
| MTPS 7_LS | 120,355 <sup>bc</sup> | ± 14.52 |
| MTPS 4_LS | 113,445 <sup>bc</sup> | ± 12.97 |
| MTPS 4_R  | 105,215 <sup>bc</sup> | ± 11.61 |
| MTPS 6_IS | 98,0454 <sup>c</sup>  | ± 10.89 |
| MTPS 6_MN | 95,839 <sup>c</sup>   | ± 9.06  |
| MTPS 5_MN | 82,6652 <sup>c</sup>  | ± 10.08 |
| MTPS 2_LS | 45,5297 <sup>d</sup>  | ± 5.83  |
| MBOS 1_IS | 40,0133 <sup>d</sup>  | ± 5.27  |
| MTPS 7_MN | 38,7512 <sup>d</sup>  | ± 4.74  |
| MTPS 6_R  | 36,3261 <sup>de</sup> | ± 4.23  |
| MTPS 2_R  | 32,1126 <sup>de</sup> | ± 4.86  |
| MTPS 3_LS | 27,2339 <sup>de</sup> | ± 3.80  |
| MTPS 5_YN | 27,1918 <sup>de</sup> | ± 3.43  |
| MTPS 5_R  | 21,3925 <sup>de</sup> | ± 3.00  |
| MTPS 4_MN | 17,3541 <sup>ef</sup> | ± 2.80  |
| MTPS 6_YN | 15,1923 <sup>ef</sup> | ± 2.90  |
| MTPS 2_MN | 14,0932 <sup>f</sup>  | ± 2.76  |
| MTPS 4_IS | 13,318 <sup>f</sup>   | ± 2.56  |
| MTPS 5_IS | 9,31126 <sup>f</sup>  | ± 2.20  |
| MTPS 7_R  | 4,37264 <sup>g</sup>  | ± 1.18  |
| MTPS 7_YN | 4,23804 <sup>g</sup>  | ± 1.37  |
| MTPS 7_IS | 3,66427 <sup>g</sup>  | ± 1.26  |
| MTPS 4_YN | 3,40483 <sup>g</sup>  | ± 1.16  |
| MTPS 2_IS | 2,39381 <sup>g</sup>  | ± 0.89  |
| MTPS 3_IS | 2,31444 <sup>g</sup>  | ± 0.77  |
| MTPS 3_R  | 2,25211 <sup>g</sup>  | ± 0.66  |
| MTPS 2_YN | 1,95116 <sup>g</sup>  | ± 0.43  |
| MTPS 3_MN | 1,2958 <sup>g</sup>   | ± 0.38  |
| MTPS 3_YN | 1 <sup>g</sup>        | ± 0.30  |

**Table S4.** List of primer pairs of *P. laricio* *MBOS*, *MTPS* and reference (*CYP* and *upLOC*) genes used in qRT-PCR analyses

| Gene         | Forward primer (5'-3')  | Reverse primer (5'-3')   |
|--------------|-------------------------|--------------------------|
| <i>MBOS1</i> | GCAATGTTCCAATCACTTCCAAG | AGGCACAGGCTCAATGACG      |
| <i>MTPS2</i> | GCTTCTCAAACCAGACTGC     | TTGGTGGCGACGCTGTAG       |
| <i>MTPS3</i> | TCTCGGGTCAACACAGGAAG    | CCATCTCGGTAGTTGTAGAAGTG  |
| <i>MTPS4</i> | CTGGAGCAACAGAGGAAGATG   | GTATTTGTAACCGTAATGGAAAGC |
| <i>MTPS5</i> | GCCCGTGGAGAAGAAGC       | TGGGAACGCTGCTGTTTG       |
| <i>MTPS6</i> | TTAAACCCGACAGCAATGTTCCC | GTGGCATCACCGTAACCATCTC   |
| <i>MTPS7</i> | TGCTGTCAATCAAGTCAATGC   | GCAACACTGAAGCCATCTCTG    |
| <i>CYP</i>   | TGTAGAGGGCTTGGAGGTC     | CAAGCGAGCTGTCCAGAGT      |
| <i>upLOC</i> | GGTTTGCTTTGGAGGATATG    | GTCCAATGTGCACCTCGT       |

## Additional figures

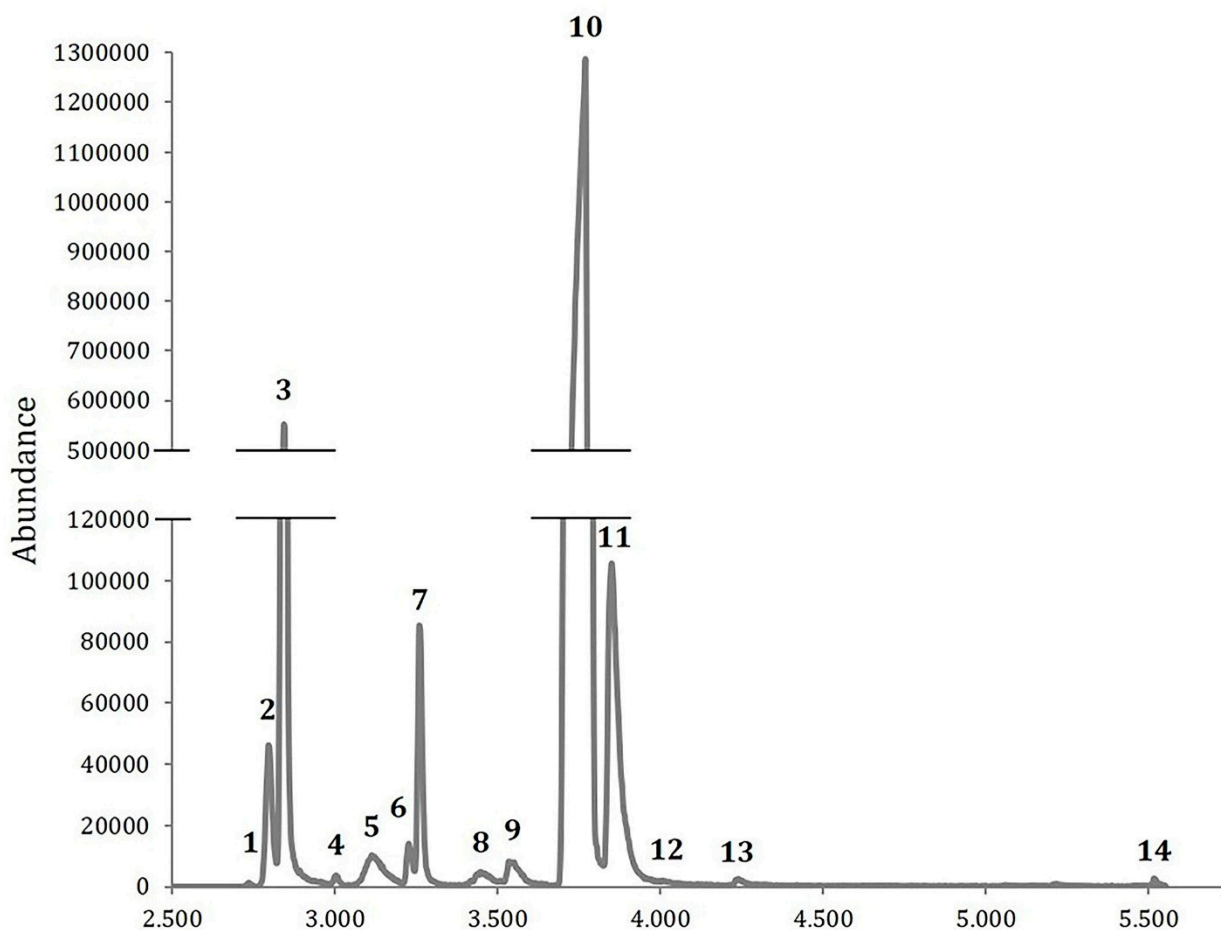

**Figure S1.** A representative GC-MS profile of the monoterpenes extracted from the young needles of *P. laricio*. Single ion monitoring at  $m/z$  136, 121 and 93. (1) tricyclene, (2)  $\alpha$ -thujene, (3)  $\alpha$ -pinene, (4)  $\alpha$ -fenchene, (5) camphene, (6) sabinene, (7)  $\beta$ -pinene, (8) myrcene, (9)  $\delta$ -3-carene, (10)  $\beta$ -phellandrene, (11) limonene, (12) terpinolene, (13)  $\alpha$ -terpineol and (14) bornyl acetate.

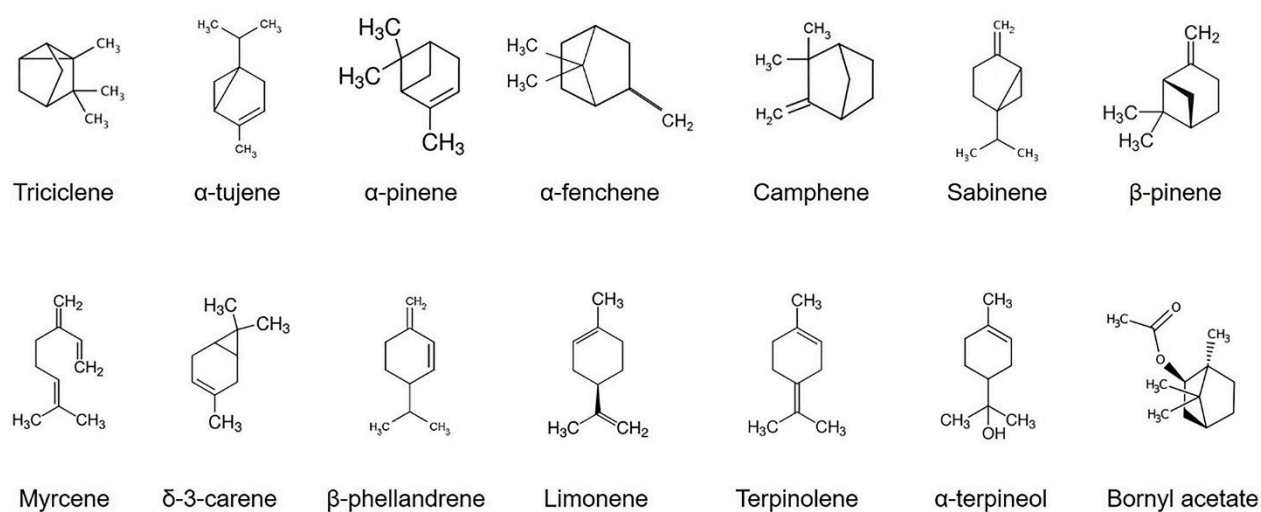

**Figure S2.** Chemical structures of the monoterpenes found in different tissues of *P. laricio*.

|            |                                                                                                    |     |
|------------|----------------------------------------------------------------------------------------------------|-----|
| Pnl MTPS 3 | MSLISAVPLASSCVSKSLISSVREHKALREIATLQMSRRGKSVAASTRMSATAGSDDGVKRRIGDYHSNLWDDNFIRSLSSPYCVSSYGEHAD      | 95  |
| Pb MTPS 6  | MSLISAVPLASSCVSKSLISSVREHTALRRAIATLQMSRRGKSVAASTRMSATAGSDDGVKRRIGDYHSNLWDDNFIRSLSSPYCASSYGEHAD     | 95  |
| Pb MTPS 7  | MSLISAVPLASSCVSKSLISSVREHKALRRAIATLQMSRRGKSVAASTRMSATAGSDDGVKRRIGDYHSNLWDDNFIRSLSSPYCASSYGEHAD     | 95  |
| Pc MTPS 4  | MSLISAVPLASSCVSKSLISSVREHTALRRAIATLQMSRRGKSVAASTRMSATAGSDDGVKRRIGDYHSNLWDDNFIRSLSSPYCASSYGEHAD     | 95  |
| Pnl MTPS 3 | RLIGEVKEIFNSFSIADGELISPVNDLLQQLWMVDNVERLGIDRHFGTEIKVALDYVYRYWSEKIGCCGRDSAFDTLNTTALAFRIFRLHGYTVS    | 190 |
| Pb MTPS 6  | RLIGEVKEIFNSFSIADGELISPVNDLLQQLWMVDNVERLGIDRHFGTEIKVALDYVYRYWSEKIGCCGRDSAFDTLNTTALAFRIFRLHGYTVS    | 190 |
| Pb MTPS 7  | RLIGEVKEIFNSFSIADGELISPVNDLLQQLWMVDNVERLGIDRHFGTEIKVALDYVYRYWSEKIGCCGRDSAFDTLNTTALAFRIFRLHGYTVS    | 190 |
| Pc MTPS 4  | RLIGEVKEIFNSFSIADGELISPVNDLLQQLWMVDNVERLGIDRHFGTEIKVALDYVYRYWSEKIGCCGRDSAFDTLNTTALAFRIFRLHGYTVS    | 190 |
| Pnl MTPS 3 | SDVFEHFKDQKGQFASANDTELQTRSVFNLFRASLIAFPEEKVLEAEKFAAAYLKAALQTLVSGLSREIQYVFDYRWHSNLPRLARSYIDI        | 285 |
| Pb MTPS 6  | SDVFEHFKDQKGQFASANDTELQTRSVFNLFRASLIAFPEEKVLEAEKFAAAYLKAALQTLVSGLSREIQYVFDYRWHSNLPRLARSYIDI        | 285 |
| Pb MTPS 7  | SDVFEHFKDQKGQFASANDTELQTRSVFNLFRASLIAFPEEKVLEAEKFAAAYLKAALQTLVSGLSREIQYVFDYRWHSNLPRLARSYIDI        | 285 |
| Pc MTPS 4  | SDVFEHFKDQKGQFASANDTELQTRSVFNLFRASLIAFPEEKVLEAEKFAAAYLKAALQTLVSGLSREIQYVFDYRWHSNLPRLARSYIDI        | 285 |
| Pnl MTPS 3 | LADNTISGTPDANTKKLLERAKLEFNIFHSVQKELQCLWRWKEWGCPCLTFIRHRYVEFYTLVSGIDMVPEHATFRLSCVKTCHLITILDDMY      | 380 |
| Pb MTPS 6  | LADNTISGTPDANTKKLLERAKLEFNIFHSVQKELQCLWRWKEWGCPCLTFIRHRYVEFYTLVSGIDMVPEHATFRLSCVKTCHLITILDDMY      | 380 |
| Pb MTPS 7  | LADNTISGTPDANTKKLLERAKLEFNIFHSVQKELQCLWRWKEWGCPCLTFIRHRYVEFYTLVSGIDMVPEHATFRLSCVKTCHLITILDDMY      | 380 |
| Pc MTPS 4  | LADNTISGTPDANTKKLLERAKLEFNIFHSVQKELQCLWRWKEWGCPCLTFIRHRYVEFYTLVSGIDMVPEHATFRLSCVKTCHLITILDDMY      | 380 |
| Pnl MTPS 3 | DTFGTIDEIRLSTAAVKRWDPSEATECLPEYMKGVYMLVETVNMENAEAKSQGRDITLGYVRQALDDYICSYLKEAWIATGYVPTFQYFENGK      | 475 |
| Pb MTPS 6  | DTFGTIDEIRLSTAAVKRWDPSEATECLPEYMKGVYMLVETVNMENAEAKSQGRDITLGYVRQALDDYICSYLKEAWIATGYVPTFQYFENGK      | 475 |
| Pb MTPS 7  | DTFGTIDEIRLSTAAVKRWDPSEATECLPEYMKGVYMLVETVNMENAEAKSQGRDITLGYVRQALDDYICSYLKEAWIATGYVPTFQYFENGK      | 475 |
| Pc MTPS 4  | DTFGTIDEIRLSTAAVKRWDPSEATECLPEYMKGVYMLVETVNMENAEAKSQGRDITLGYVRQALDDYICSYLKEAWIATGYVPTFQYFENGK      | 475 |
| Pnl MTPS 3 | LSSGHRITATLPILTLISIPFPHHILQEIFPSKSFNDYAA...SILRLRGDTRCYKADSARGEASCHSCYMKENEGSTQEDALNHINOMIEDMIKKLN | 565 |
| Pb MTPS 6  | LSSGHRITATLPILTLISIPFPHHILQEIFPSKSFNDYAA...SILRLRGDTRCYKADSARGEASCHSCYMKENEGSTQEDALNHINOMIEDMIKKLN | 570 |
| Pb MTPS 7  | LSSGHRITATLPILTLISIPFPHHILQEIFPSKSFNDYAA...SILRLRGDTRCYKADSARGEASCHSCYMKENEGSTQEDALNHINOMIEDMIKKLN | 570 |
| Pc MTPS 4  | LSSGHRITATLPILTLISIPFPHHILQEIFPSKSFNDYAA...SILRLRGDTRCYKADSARGEASCHSCYMKENEGSTQEDALNHINOMIEDMIKKLN | 570 |
| Pnl MTPS 3 | WEFLRPDSAPISKKHAFNISRGLHFFNYNRDGYSVASKCTKDLVIKTVLEPVLN                                             | 621 |
| Pb MTPS 6  | WEFLRPDSAPISKKHAFNISRGLHFFNYNRDGYSVASKCTKDLVIKTVLEPVLN                                             | 626 |
| Pb MTPS 7  | WEFLRPDSAPISKKHAFNISRGLHFFNYNRDGYSVASKCTKDLVIKTVLEPVLN                                             | 626 |
| Pc MTPS 4  | WEFLRPDSAPISKKHAFNISRGLHFFNYNRDGYSVASKCTKDLVIKTVLEPVLN                                             | 626 |

**Figure S3.** Alignment of deduced amino acid sequences of MTPSs belonging to the phylogenetic group 3. Amino acid residues with blue background indicate highly conserved regions, while amino acid residues which are identical in more than 50% of the proteins are in pink background. Pb, *Pinus banksiana*; Pc, *Pinus contorta*; Pnl, *Pinus nigra* subsp. *laricio* (*P. laricio*).



|            |                                                                                                  |     |
|------------|--------------------------------------------------------------------------------------------------|-----|
| Pnl MTPS 5 | MSPVSVISLPSHLYLPTSFIDRSGRELIPLHITIPNVAMRRQGLMTRASMSVNLRTAVSDDAVIRRRGDHSHNLWDDDLIQSLSPYGEPSYRE    | 95  |
| Pb MTPS 1  | MSPVSVISLPSDLCLPTSFIDRSGRELIPLHITIPNVAMRRQGLMTRASMSVNLRTAVSDDAVIRRRGDHSHNLWDDDLIQSLSPYGEPSYRE    | 95  |
| Pc MTPS 1  | MSPVSVISLPSDLCLPTSFIDRSGRELIPLHITIPNVAMRRQGLMTRASMSVNLRTAVSDDAVIRRRGDHSHNLWDDDLIQSLSPYGEPSYRE    | 95  |
| Pt MTPS 1  | MSPVSVISLPSDLCLPTSFIDRSGRELIPLHITIPNVAMRRQGLMTRASMSVNLRTAVSDDAVIRRRGDHSHNLWDDDLIQSLSPYGEPSYRE    | 95  |
| Pnl MTPS 5 | RAERLIGEVKKLFNSMSEENGSLITPLDLDLIQRLWMVDSVERLGIDRHEKKEIKSALDHVYSYWSVEKGIGCGRESVVTDLNSTALGLRTLRLRG | 190 |
| Pb MTPS 1  | RAERLIGEVKNSFNMSNEDDSISITPLDLDLIQRLWMVDSVERLGIDRHEKKEIKSALDHVYSYWSVEKGIGCGRESVVTDLNSTALGLRTLRLRG | 189 |
| Pc MTPS 1  | RAERLIGEVKNSFNMSNEDDSISITPLDLDLIQRLWMVDSVERLGIDRHEKKEIKSALDHVYSYWSVEKGIGCGRESVVTDLNSTALGLRTLRLRG | 189 |
| Pt MTPS 1  | RAERLIGEVKNSFNMSNEDDSISITPLDLDLIQRLWMVDSVERLGIDRHEKKEIKSALDHVYSYWSVEKGIGCGRESVVTDLNSTALGLRTLRLRG | 189 |
| Pnl MTPS 5 | YDVSAEVLNHFKNQSGQFACTLKOT.....EDQIRTVNLNLYRASLIAPFGEKVMDEAEFSAKYKDALQKIPVSSLSREIEDVLEYGWHYTLF    | 285 |
| Pb MTPS 1  | YDVSAEVLNHFKNQSGQFACTLKOT.....EDQIRTVNLNLYRASLIAPFGEKVMDEAEFSAKYKDALQKIPVSSLSREIEDVLEYGWHYTLF    | 278 |
| Pc MTPS 1  | YDVSAEVLNHFKNQSGQFACTLKOT.....EDQIRTVNLNLYRASLIAPFGEKVMDEAEFSAKYKDALQKIPVSSLSREIEDVLEYGWHYTLF    | 278 |
| Pt MTPS 1  | YDVSAEVLNHFKNQSGQFACTLKOT.....EDQIRTVNLNLYRASLIAPFGEKVMDEAEFSAKYKDALQKIPVSSLSREIEDVLEYGWHYTLF    | 278 |
| Pnl MTPS 5 | RLEARNYDVFGQDTNNSQSYMKTEKLELAKLEFNIFHALQKRELEYLVRWWKSGSGSPQMTFCRHRHVEYYTLASCIAFEQHSGLFRLGFAKAC   | 380 |
| Pb MTPS 1  | RLEARNYDVFGQDTNNSQSYMKTEKLELAKLEFNIFHALQKRELEYLVRWWKSGSGSPQMTFCRHRHVEYYTLASCIAFEQHSGLFRLGFAKAC   | 373 |
| Pc MTPS 1  | RLEARNYDVFGQDTNNSQSYMKTEKLELAKLEFNIFHALQKRELEYLVRWWKSGSGSPQMTFCRHRHVEYYTLASCIAFEQHSGLFRLGFAKAC   | 373 |
| Pt MTPS 1  | RLEARNYDVFGQDTNNSQSYMKTEKLELAKLEFNIFHALQKRELEYLVRWWKSGSGSPQMTFCRHRHVEYYTLASCIAFEQHSGLFRLGFAKAC   | 373 |
| Pnl MTPS 5 | HIITVLDDMYDTFGTLDELELFTSAIKRWDPSEATECLPEYMKGVYMIYNTVNEMSQEADKAQGRDTLNYCRQAWEEYIDAYMQEAKWIASGEVP  | 475 |
| Pb MTPS 1  | HIITVLDDMYDTFGTLDELELFTSAIKRWDPSEATECLPEYMKGVYMIYNTVNEMSQEADKAQGRDTLNYCRQAWEEYIDAYMQEAKWIASGEVP  | 468 |
| Pc MTPS 1  | HIITVLDDMYDTFGTLDELELFTSAIKRWDPSEATECLPEYMKGVYMIYNTVNEMSQEADKAQGRDTLNYCRQAWEEYIDAYMQEAKWIASGEVP  | 468 |
| Pt MTPS 1  | HIITVLDDMYDTFGTLDELELFTSAIKRWDPSEATECLPEYMKGVYMIYNTVNEMSQEADKAQGRDTLNYCRQAWEEYIDAYMQEAKWIASGEVP  | 468 |
| Pnl MTPS 5 | TFEEYYENGKVYSGHRVSALQPIILTTDIPFPEHVLKEVDIPSKLNDLASAILRLRGDTRCYQADRARGEASCSICYMKDNPCTTEEDALNHINA  | 570 |
| Pb MTPS 1  | TFEEYYENGKVYSGHRVSALQPIILTTDIPFPEHVLKEVDIPSKLNDLASAILRLRGDTRCYQADRARGEASCSICYMKDNPCTTEEDALNHINA  | 563 |
| Pc MTPS 1  | TFEEYYENGKVYSGHRVSALQPIILTTDIPFPEHVLKEVDIPSKLNDLASAILRLRGDTRCYQADRARGEASCSICYMKDNPCTTEEDALNHINA  | 563 |
| Pt MTPS 1  | TFEEYYENGKVYSGHRVSALQPIILTTDIPFPEHVLKEVDIPSKLNDLASAILRLRGDTRCYQADRARGEASCSICYMKDNPCTTEEDALNHINA  | 563 |
| Pnl MTPS 5 | MISDVIKGLNELLKPNSSVPIAKKHAFDVSRAFHGYGYKRDGYSVASIEETKSLVKRTVIDPVTL                                | 636 |
| Pb MTPS 1  | MISDVIKGLNELLKPNSSVPIAKKHAFDVSRAFHGYGYKRDGYSVASIEETKSLVKRTVIDPVTL                                | 629 |
| Pc MTPS 1  | MISDVIKGLNELLKPNSSVPIAKKHAFDVSRAFHGYGYKRDGYSVASIEETKSLVKRTVIDPVTL                                | 629 |
| Pt MTPS 1  | MISDVIKGLNELLKPNSSVPIAKKHAFDVSRAFHGYGYKRDGYSVASIEETKSLVKRTVIDPVTL                                | 629 |

**Figure S4.** Alignment of deduced amino acid sequences of MTPSs belonging to the phylogenetic group 5. Amino acid residues with blue background indicate highly conserved regions, while amino acid residues which are identical in more than 50% of the proteins are in pink background. Pb, *Pinus banksiana*; Pc, *Pinus contorta*; Pt, *Pinus taeda*; Pnl, *Pinus nigra* subsp. *laricio* (*P. laricio*).
